# Supplementary material for: Alternative to prophylactic antibiotics for the treatment of recurrent urinary tract infections in women: multicentre, open label, randomised, non-inferiority trial
Source: PubMed Central journal article supplement (PMC8905684; doi:10.1136/bmj-2021-0068229), 2022-03-09
Supplement: harc068229.ww.pdf [file harc068229.ww.pdf]

## SUPPLEMENTARY INFORMATION

### **Attribution of the primary outcome measure**

The primary outcome measure was collected across multiple data sources; participant-completed UTI logs, 3-monthly participant-reported questionnaires, and 3-monthly site-reported case report forms. Episodes of UTI were identified by the trial statistician using statistical programming, using the following pre-defined hierarchy of evidence to avoid double counting:

1. Data from healthcare records
2. Participant-reported UTI log completed at the time of UTI
3. Phone-reported UTI log completed at the time of UTI
4. 3-monthly site-reported case report forms
5. 3-monthly participant-reported questionnaires

An independent clinician not otherwise involved in the trial reviewed primary outcome data, blind to treatment allocation, for a 10% sample of cases and was asked to identify symptomatic UTI episodes following the same hierarchy. The number of UTI episodes was found to match in all cases when following the pre-defined criteria.

### **Multi-drug resistance definition**

Multi-drug resistance was defined as resistance in *E. coli* to at least one antimicrobial agent in at least three antimicrobial categories, following the principles described by Magiorakos *et al.* The antimicrobial agents and categories were tailored to be specific to uropathogens and are given below:

| <b>Antimicrobial category</b>               | <b>Antimicrobial agent</b>                                   |
|---------------------------------------------|--------------------------------------------------------------|
| Aminoglycosides                             | gentamicin                                                   |
| Antipseudomonal penicillin                  | piperacillin/tazobactam                                      |
| Carbapenems                                 | ertapenem; meropenem                                         |
| Non-extended spectrum cephalosporins        | cefuroxime; cefalexin                                        |
| Fluoroquinolones                            | ciprofloxacin                                                |
| Folate pathway inhibitors                   | trimethoprim-sulphamethoxazole(co-trimoxazole); trimethoprim |
| Monobactams                                 | aztreonam                                                    |
| Penicillins                                 | amoxicillin; mecillinam;                                     |
| Penicillins + $\beta$ -lactamase inhibitors | amoxicillin-clavulanic acid (co-amoxiclav)                   |
| $\beta$ -lactamase resistant penicillin     | temocillin                                                   |
| Phosphonic acids                            | fosfomicin                                                   |
| Nitrofurans                                 | nitrofurantoin                                               |

Magiorakos AP, Srinivasan A, Carey RB, Carmeli Y, Falagas ME, Giske CG, *et al.* Multidrug-resistant, extensively drug-resistant and pandrug-resistant bacteria: an international expert proposal for interim standard definitions for acquired resistance. *Clin Microbiol Infect* 2012;**18**:268-81. <https://doi.org/10.1111/j.1469-0691.2011.03570.x>

**Table s1: Summary of analysis populations**

|                                                                            | 12-month treatment period |                       |                        |                       |                        |                       |                        |                       | 6-month post-treatment observational period |                       |             |
|----------------------------------------------------------------------------|---------------------------|-----------------------|------------------------|-----------------------|------------------------|-----------------------|------------------------|-----------------------|---------------------------------------------|-----------------------|-------------|
|                                                                            | Modified ITT              |                       | ITT                    |                       | Per-protocol           |                       | Strict per-protocol*   |                       | Antibiotic prophylaxis                      | Methenamine hippurate |             |
|                                                                            | Antibiotic prophylaxis    | Methenamine hippurate | Antibiotic prophylaxis | Methenamine hippurate | Antibiotic prophylaxis | Methenamine hippurate | Antibiotic prophylaxis | Methenamine hippurate | Antibiotic prophylaxis                      | Methenamine hippurate |             |
| Number analysed                                                            | 102 (85%)                 | 103 (86%)             | 120 (100%)             | 120 (100%)            | 84 (70%)               | 86 (72%)              | 82 (68%)               | 71 (59%)              | 97 (81%)                                    | 98 (82%)              |             |
| ≥90% compliance with any trial preventative treatment                      | 84 (82%)                  | 86 (83%)              | 84 (70%)               | 86 (72%)              | 84 (100%)              | 86 (100%)             | 82 (100%)              | 71 (100%)             | 82 (85%)                                    | 85 (87%)              |             |
| Received alternative treatment strategy                                    | 7 (7%)                    | 19 (18%)              | 7 (6%)                 | 22 (18%)              | 2 (2%)                 | 15 (17%)              | 0 (0%)                 | 0 (0%)                | 5 (5%)                                      | 15 (15%)              |             |
| Follow-up time (days)                                                      | Mean (SD)                 | 362.6 (14.5)          | 361.6 (18.0)           | 319.4 (105.6)         | 323.1 (97.8)           | 364.7 (2.9)           | 364.8 (1.7)            | 365.0 (0.0)           | 365.0 (0.0)                                 | 179.9 (11.2)          | 181.4 (7.0) |
|                                                                            | Min, Max                  | 239, 365              | 218, 365               | 14, 365               | 35, 365                | 338, 365              | 349, 365               | 365, 365              | 365, 365                                    | 83, 183               | 120, 183    |
| Menopausal status                                                          | Pre                       | 40 (39%)              | 41 (40%)               | 49 (41%)              | 50 (42%)               | 30 (36%)              | 34 (40%)               | 29 (35%)              | 32 (45%)                                    | 35 (36%)              | 39 (40%)    |
|                                                                            | Peri/Post                 | 62 (61%)              | 62 (60%)               | 71 (59%)              | 70 (58%)               | 54 (64%)              | 52 (60%)               | 53 (65%)              | 39 (55%)                                    | 62 (64%)              | 59 (60%)    |
| Self-reported urinary tract infections in the 12 months before trial entry | <4                        | 12 (12%)              | 16 (16%)               | 14 (12%)              | 16 (13%)               | 11 (13%)              | 14 (16%)               | 11 (13%)              | 12 (17%)                                    | 12 (12%)              | 16 (16%)    |
|                                                                            | ≥4                        | 90 (88%)              | 87 (84%)               | 106 (88%)             | 104 (87%)              | 73 (87%)              | 72 (84%)               | 71 (87%)              | 59 (83%)                                    | 85 (88%)              | 82 (84%)    |

\*Post-hoc analysis. ITT: intention-to-treat

- Modified intention to treat - this was the primary analysis and included all patients with at least 6 months of follow-up data analysed according to their original treatment allocation.
- Strict intention to treat - this included all patients who were randomised analysed according to their original treatment allocation.
- Per protocol – this included all patients with at least 6 months of follow-up data who achieved 90% or greater compliance with any trial preventative treatment analysed according to their original treatment allocation.
- Post-hoc strict per protocol - this included only those patients who achieved 90% or greater compliance with their original allocated treatment, excluding those who changed treatment arm during the trial.

**Figure s1: Frequency of symptomatic, antibiotic-treated UTI episodes**

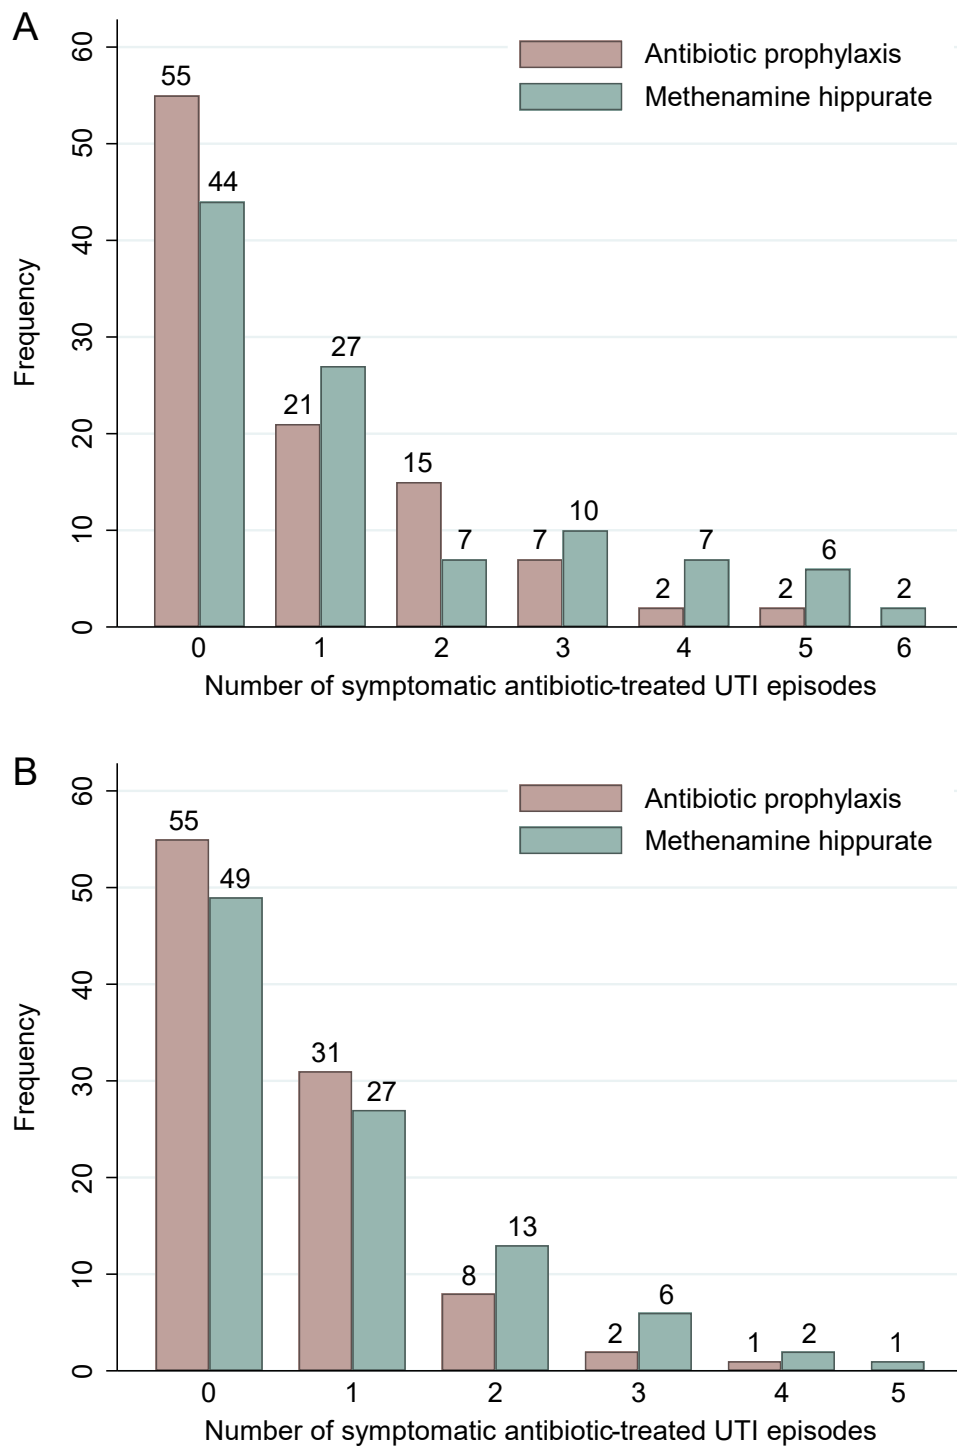

**(A)** Frequency of symptomatic antibiotic-treated UTI episodes during the 12-month preventative treatment period (modified intention-to-treat population). **(B)** Frequency of symptomatic antibiotic-treated UTI episodes during the 6-month post-treatment observational period.

**Table s2: Secondary analysis of the primary outcome, excluding time taking therapeutic antibiotics for UTI from follow-up (exposure) time**

|                                    | Number included in analysis | Incidence rate (95% CI) | Absolute difference (90% CI) | Incidence rate ratio‡ (95% CI) |
|------------------------------------|-----------------------------|-------------------------|------------------------------|--------------------------------|
| <b>Modified intention-to-treat</b> |                             |                         |                              |                                |
| Antibiotic prophylaxis             | 102                         | 0.91 (0.66-1.15)        | ..                           | ..                             |
| Methenamine hippurate              | 103                         | 1.43 (1.07-1.79)        | 0.52 (0.16-0.89)             | 1.55 (1.17-2.06)               |
| <b>Intention-to-treat</b>          |                             |                         |                              |                                |
| Antibiotic prophylaxis             | 120                         | 0.89 (0.65-1.13)        | ..                           | ..                             |
| Methenamine hippurate              | 120                         | 1.45 (1.11-1.80)        | 0.56 (0.21-0.91)             | 1.62 (1.26-2.09)               |
| <b>Per-protocol</b>                |                             |                         |                              |                                |
| Antibiotic prophylaxis             | 84                          | 0.89 (0.61-1.16)        | ..                           | ..                             |
| Methenamine hippurate              | 86                          | 1.34 (0.95-1.72)        | 0.45 (0.05-0.84)             | 1.48 (1.03-2.13)               |
| <b>Strict per-protocol</b>         |                             |                         |                              |                                |
| Antibiotic prophylaxis             | 82                          | 0.84 (0.59-1.10)        | ..                           | ..                             |
| Methenamine hippurate              | 71                          | 1.16 (0.77-1.55)        | 0.32 (-0.08-0.71)            | 1.38 (1.07-1.79)               |

‡ Negative binomial model adjusted for menopausal status (pre and peri/post), prior UTI frequency (<4 and ≥4) and site (random effect).

**Table s3: Number of participants reporting at least one episode of symptomatic, antibiotic-treated UTI**

|                                                  | Antibiotic prophylaxis | Methenamine hippurate | Odds Ratio (95% CI)‡ |
|--------------------------------------------------|------------------------|-----------------------|----------------------|
| <b>12-month treatment period</b>                 |                        |                       |                      |
| Modified intention-to-treat                      | 47/102 (46%)           | 59/103 (57%)          | 1.55 (0.88-2.74)     |
| Intention-to-treat                               | 49/120 (41%)           | 64/120 (53%)          | 1.69 (1.00-2.87)     |
| Per-protocol                                     | 39/84 (46%)            | 45/86 (52%)           | 1.29 (0.69-2.41)     |
| Strict per-protocol                              | 38/82 (46%)            | 35/71 (49%)           | 1.14 (0.59-2.21)     |
| <b>6-month post-treatment observation period</b> | 42/97 (43%)            | 49/98 (50%)           | 1.32 (0.73-2.39)     |

Data are n/N (%) unless otherwise stated. ‡ Logistic regression model adjusted for menopausal status (pre and peri/post), prior UTI frequency (<4 and ≥4) and site (random effect).

**Table s4: Incidence of symptomatic, antibiotic-treated UTI episodes during the 6-month post-treatment observation period**

|                        | Number included in analysis | Incidence rate (95% CI) | Absolute difference (95% CI) | Incidence rate ratio‡ (95% CI) |
|------------------------|-----------------------------|-------------------------|------------------------------|--------------------------------|
| Antibiotic prophylaxis | 97                          | 1.19 (0.86-1.52)        | ..                           | ..                             |
| Methenamine hippurate  | 98                          | 1.72 (1.27-2.18)        | 0.53 (-0.03-1.09)            | 1.45 (1.16-1.81)               |

‡ Negative binomial model adjusted for menopausal status (pre and peri/post), prior UTI frequency (<4 and ≥4) and site (random effect).

**Table s5: Episodes of microbiologically-confirmed symptomatic, antibiotic-treated UTI**

|                                                  | Number included in analysis | Incidence rate (95% CI) | Absolute difference (95% CI) | Incidence rate ratio (95% CI) |
|--------------------------------------------------|-----------------------------|-------------------------|------------------------------|-------------------------------|
| <b>12-month treatment period</b>                 |                             |                         |                              |                               |
| Modified intention-to-treat                      |                             |                         |                              |                               |
| Antibiotic prophylaxis                           | 102                         | 0.41 (0.27-0.56)        | ..                           | ..                            |
| Methenamine hippurate                            | 103                         | 0.53 (0.34-0.72)        | 0.11 (-0.12-0.35)            | 1.25 (1.05-1.49) ‡            |
| <b>6-month post-treatment observation period</b> |                             |                         |                              |                               |
| Antibiotic prophylaxis                           | 97                          | 0.48 (0.28-0.68)        | ..                           | ..                            |
| Methenamine hippurate                            | 98                          | 0.86 (0.59-1.14)        | 0.38 (0.04-0.72)             | 1.86 (1.27-2.73)†             |

‡ Negative binomial model adjusted for menopausal status (pre and peri/post), prior UTI frequency (<4 and ≥4) and site (random effect). † Poisson model adjusted for menopausal status (pre and peri/post), prior UTI frequency (<4 and ≥4) and site (random effect). A Poisson model was as this proved a better model fit than the negative binomial model.

**Table s6: Asymptomatic bacteriuria**

|                  | Antibiotic prophylaxis<br>(N=120) | Methenamine hippurate<br>(N=120) | $\chi^2$ p-value |
|------------------|-----------------------------------|----------------------------------|------------------|
| Baseline         | 18/111 (16%)                      | 13/111 (12%)                     | -                |
| During treatment | 22/323 (7%)                       | 44/326 (14%)                     | 0.0048           |
| During follow-up | 24/123 (20%)                      | 22/134 (16%)                     | 0.52             |

Data are number of positive urine cultures / number of routine urine samples (%)

**Table s7: Therapeutic antibiotic use during the 12-month treatment period and 6-month post-treatment observation period**

|                                                     | 12-month treatment period           |                                    | 6-month post-treatment period      |                                   |
|-----------------------------------------------------|-------------------------------------|------------------------------------|------------------------------------|-----------------------------------|
|                                                     | Antibiotic Prophylaxis<br>(N = 120) | Methenamine Hippurate<br>(N = 120) | Antibiotic Prophylaxis<br>(N = 97) | Methenamine Hippurate<br>(N = 98) |
| <b>Therapeutic antibiotics for UTI</b>              |                                     |                                    |                                    |                                   |
| No. receiving $\geq 1$ day of treatment             | 51 (43%)                            | 67 (56%)                           | 48 (49%)                           | 52 (53%)                          |
| Antibiotic(s) received*                             |                                     |                                    |                                    |                                   |
| Nitrofurantoin                                      | 33 (65%)                            | 47 (70%)                           | 33 (69%)                           | 42 (81%)                          |
| Trimethoprim                                        | 21 (41%)                            | 17 (25%)                           | 13 (27%)                           | 9 (17%)                           |
| Cefalexin                                           | 8 (16%)                             | 11 (16%)                           | 3 (6%)                             | 8 (15%)                           |
| Meropenem                                           | 0 (0%)                              | 0 (0%)                             | 0 (0%)                             | 1 (2%)                            |
| Cefuroxime                                          | 0 (0%)                              | 1 (1%)                             | 0 (0%)                             | 0 (0%)                            |
| Penicillin V                                        | 0 (0%)                              | 1 (1%)                             | 0 (0%)                             | 0 (0%)                            |
| Ampicillin                                          | 0 (0%)                              | 1 (1%)                             | 0 (0%)                             | 0 (0%)                            |
| Amoxicillin                                         | 6 (12%)                             | 8 (12%)                            | 5 (10%)                            | 4 (8%)                            |
| Co-amoxiclav                                        | 7 (14%)                             | 6 (9%)                             | 1 (2%)                             | 0 (0%)                            |
| Doxycyclin                                          | 1 (2%)                              | 0 (0%)                             | 0 (0%)                             | 0 (0%)                            |
| Gentamicin                                          | 0 (0%)                              | 2 (3%)                             | 0 (0%)                             | 0 (0%)                            |
| Clarithromycin                                      | 1 (2%)                              | 1 (1%)                             | 0 (0%)                             | 0 (0%)                            |
| Metronidazole                                       | 0 (0%)                              | 2 (3%)                             | 0 (0%)                             | 1 (2%)                            |
| Ciprofloxacin                                       | 7 (14%)                             | 9 (13%)                            | 3 (6%)                             | 5 (10%)                           |
| Pivmecillinam                                       | 7 (14%)                             | 9 (13%)                            | 5 (10%)                            | 6 (12%)                           |
| Fosfomycin                                          | 0 (0%)                              | 0 (0%)                             | 1 (2%)                             | 0 (0%)                            |
| Total days of treatment                             | 13 (8-19)                           | 16 (7-25)                          | 7.5 (4-15)                         | 13.5 (6.5-23)                     |
| <b>Therapeutic antibiotics for other infections</b> |                                     |                                    |                                    |                                   |
| No. receiving $\geq 1$ day of treatment             | 32 (27%)                            | 38 (32%)                           | 15 (15%)                           | 28 (29%)                          |
| Total days of treatment                             | 10.5 (7-20.5)                       | 9 (6-19)                           | 8 (7-12)                           | 8 (5.5-13)                        |

\*Number of participants receiving each antibiotic. % of those receiving  $\geq 1$  day of therapeutic antibiotic treatment for UTI.

Data are n(%), or median (IQR)

**Table s8: Antibiotic resistance in *E. coli* isolated from perineal swabs**

|                                                      | Antibiotic prophylaxis (N=120) |              |              |              | Methenamine hippurate (N=120) |              |              |              |
|------------------------------------------------------|--------------------------------|--------------|--------------|--------------|-------------------------------|--------------|--------------|--------------|
|                                                      | Baseline                       | Month 6      | Month 12     | Month 18     | Baseline                      | Month 6      | Month 12     | Month 18     |
| Samples available                                    | 107 (89%)                      | 75 (63%)     | 66 (55%)     | 59 (49%)     | 94 (78%)                      | 79 (66%)     | 70 (58%)     | 62 (52%)     |
| <i>E. coli</i> isolated                              | 76 (71%)                       | 51 (68%)     | 43 (65%)     | 39 (66%)     | 64 (68%)                      | 58 (73%)     | 47 (67%)     | 45 (73%)     |
| Any antibiotic resistance in <i>E. coli</i>          | 44 (58%)                       | 32 (63%)     | 30 (70%)     | 15 (38%)     | 35 (55%)                      | 31 (53%)     | 24 (51%)     | 19 (42%)     |
| Resistance in <i>E. coli</i> (number of antibiotics) | 1 (0-3); 0-8                   | 1 (0-2); 0-6 | 1 (0-2); 0-7 | 0 (0-2); 0-4 | 1 (0-3); 0-9                  | 1 (0-2); 0-6 | 1 (0-2); 0-6 | 0 (0-2); 0-8 |
| Multi-drug resistance in <i>E. coli</i>              | 16 (21%)                       | 8 (16%)      | 8 (19%)      | 2 (5%)       | 13 (20%)                      | 7 (12%)      | 6 (13%)      | 9 (20%)      |

Data are n (%) or median (IQR); range.

**Table s9a: Availability of 3-monthly urine samples**

|          | Antibiotic prophylaxis (N=120) |                         | Methenamine hippurate (N=120) |                         |
|----------|--------------------------------|-------------------------|-------------------------------|-------------------------|
|          | Samples available              | <i>E. coli</i> isolated | Samples available             | <i>E. coli</i> isolated |
| Baseline | 111 (93%)                      | 15 (14%)                | 111 (93%)                     | 7 (6%)                  |
| Month 3  | 95 (79%)                       | 2 (2%)                  | 96 (80%)                      | 8 (8%)                  |
| Month 6  | 81 (68%)                       | 4 (5%)                  | 89 (74%)                      | 9 (10%)                 |
| Month 9  | 79 (66%)                       | 3 (4%)                  | 81 (68%)                      | 5 (6%)                  |
| Month 12 | 74 (62%)                       | 5 (7%)                  | 78 (65%)                      | 12 (15%)                |
| Month 15 | 64 (53%)                       | 11 (17%)                | 71 (59%)                      | 8 (11%)                 |
| Month 18 | 62 (52%)                       | 7 (11%)                 | 71 (59%)                      | 8 (11%)                 |

**Table s9b: Isolates identified from all urine samples**

| Isolate                           | Antibiotic prophylaxis | Methenamine hippurate |
|-----------------------------------|------------------------|-----------------------|
| <i>Escherichia coli</i>           | 84 (71%)               | 114 (66%)             |
| Coliform Other                    | 6 (5%)                 | 15 (9%)               |
| <i>Enterococcus faecalis</i>      | 10 (8%)                | 9 (5%)                |
| <i>Klebsiella pneumonia</i>       | 2 (2%)                 | 13 (8%)               |
| <i>Pseudomonas aeruginosa</i>     | 1 (1%)                 | 8 (5%)                |
| <i>Streptococcus agalactiae</i>   | 3 (3%)                 | 4 (2%)                |
| <i>Acinetobacter spr</i>          | 4 (3%)                 | 1 (1%)                |
| <i>Staphylococcus aureus</i>      | 0 (0%)                 | 3 (2%)                |
| <i>Proteus sp</i>                 | 1 (1%)                 | 1 (1%)                |
| <i>Proteus mirabilis</i>          | 2 (2%)                 | 0 (0%)                |
| <i>Klebsiella oxytoca</i>         | 1 (1%)                 | 1 (1%)                |
| <i>Enterobacter cloacae</i> group | 1 (1%)                 | 0 (0%)                |
| <i>Citrobacter freundii</i> group | 0 (0%)                 | 1 (1%)                |
| <i>Pseudomonas sp</i>             | 0 (0%)                 | 1 (1%)                |
| <i>Enterococcus faecium</i>       | 1 (1%)                 | 0 (0%)                |
| <i>Streptococcus sp</i>           | 1 (1%)                 | 0 (0%)                |
| <i>Streptococcus bovis</i>        | 0 (0%)                 | 1 (1%)                |
| <i>Candida albicans</i>           | 1 (1%)                 | 0 (0%)                |
| Total                             | 118                    | 172                   |



**Figure s2: Antibiotic resistance in symptomatic urine samples submitted during the 12-month preventive treatment period and 6-month post-treatment observational period**

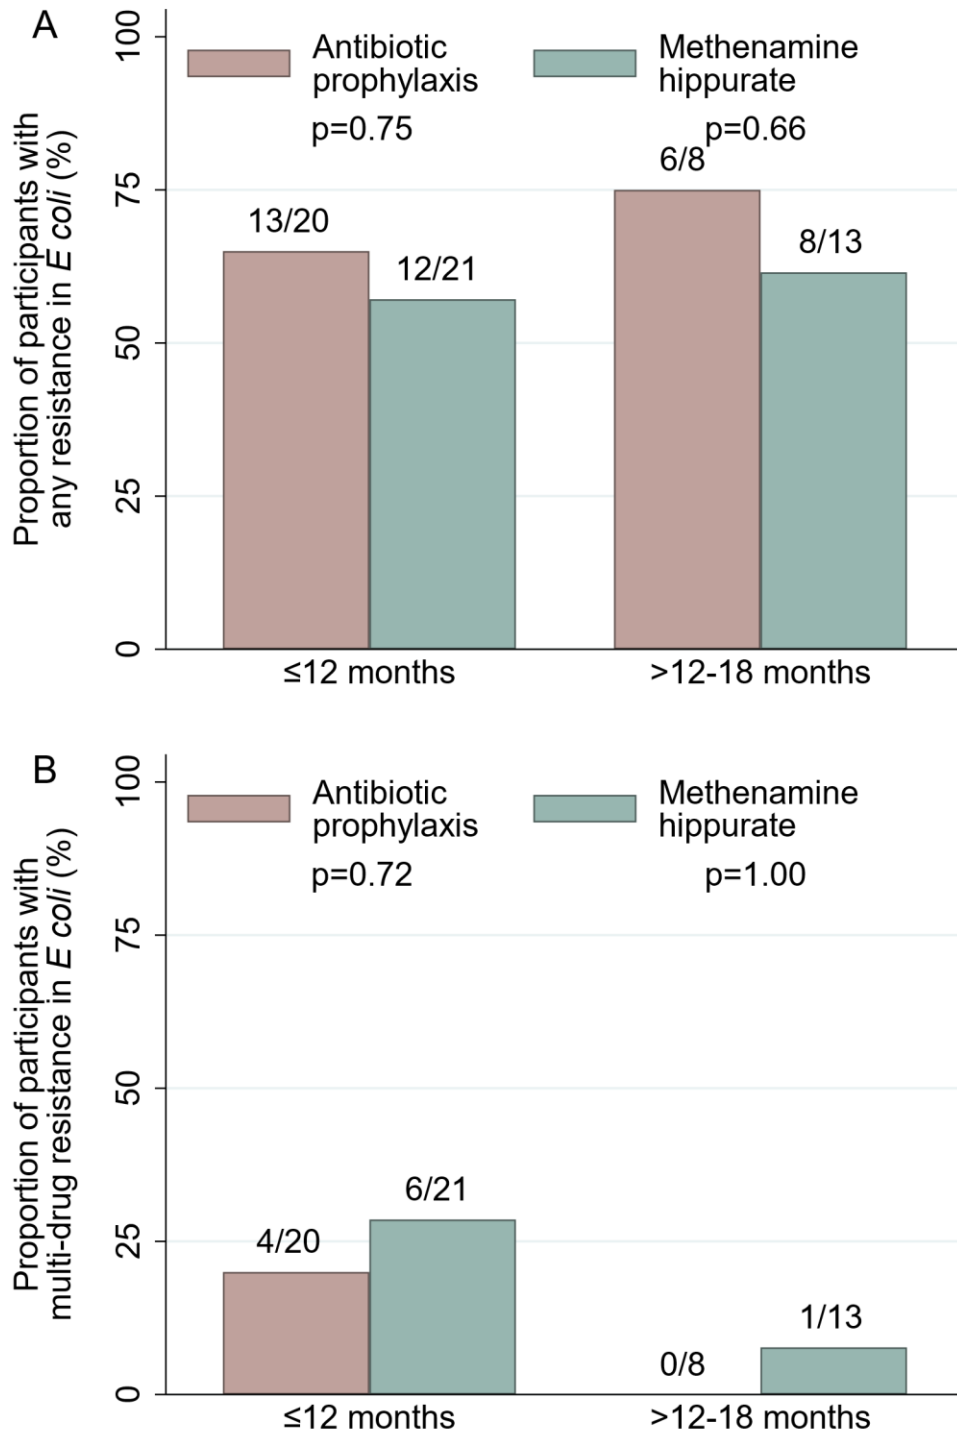

(A) Proportion of participants demonstrating resistance to at least one antibiotic in *E. coli* isolated from a symptomatic urine sample (out of those with *E. coli* isolated from a symptomatic urine sample).  $\chi^2$  p-values. (B) Proportion of participants demonstrating multi-drug resistance in *E. coli* isolated from a symptomatic urine samples (of those with *E. coli* isolated from a symptomatic urine sample). Fisher's exact p-values.

**Figure s3: Antibiotic resistance rates (per sample) in *E. coli* isolated from symptomatic urine samples submitted during the 12-month preventive treatment period and 6-month post-treatment observational period**

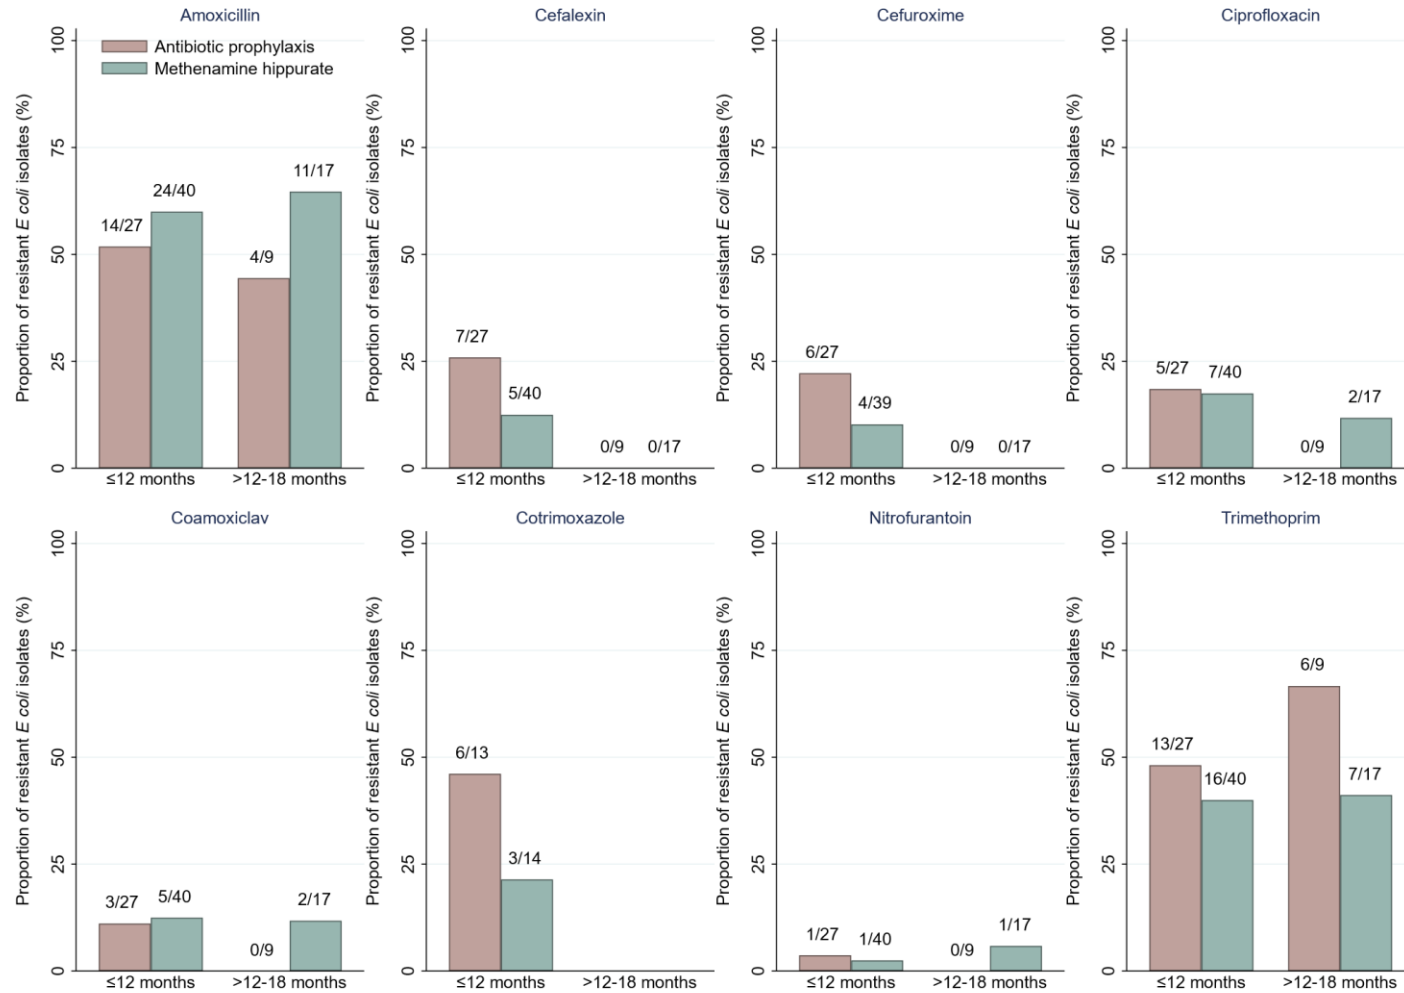

**Table s10: Treatment satisfaction questionnaire for medication (TSQM) domain scores**

|                     | Antibiotic Prophylaxis<br>(N=120) | Methenamine hippurate<br>(N=120) | Comparison between groups                               |                                   |
|---------------------|-----------------------------------|----------------------------------|---------------------------------------------------------|-----------------------------------|
|                     |                                   |                                  | Mean difference (95% CI);<br>two-sample t-test, p-value | ANCOVA <sup>‡</sup> , p-<br>value |
| <b>Month 12</b>     |                                   |                                  |                                                         |                                   |
| Effectiveness       | 80.0 (22.5); 63                   | 77.5 (23.7); 74                  | -2.5 (-10.4, 5.4); 0.53                                 | 0.43                              |
| Side effects        | 92.9 (19.2); 62                   | 95.8 (13.7); 72                  | 2.9 (-2.7, 8.5); 0.31                                   | 0.29                              |
| Convenience         | 91.4 (12.7); 64                   | 82.2 (18.4); 73                  | -9.2 (-14.6, -3.8); 0.001                               | 0.001                             |
| Global satisfaction | 80.6 (22.4); 64                   | 77.3 (23.9); 73                  | -3.3 (-11.2, 4.5); 0.40                                 | 0.34                              |
| <b>Month 18</b>     |                                   |                                  |                                                         |                                   |
| Effectiveness       | 74.4 (28.8); 57                   | 75.0 (24.7); 69                  | 0.7 (-8.8, 10.1); 0.89                                  | 0.95                              |
| Side effects        | 93.2 (18.2); 55                   | 94.9 (15.7); 70                  | 1.7 (-4.3, 7.7); 0.57                                   | 0.56                              |
| Convenience         | 85.7 (17.0); 59                   | 84.6 (15.7); 72                  | -1.1 (-6.8, 4.5); 0.69                                  | 0.70                              |
| Global satisfaction | 75.8 (25.5); 60                   | 74.7 (27.1); 72                  | -1.1 (-10.3, 8.0); 0.81                                 | 0.70                              |

Data are mean (SD); number with data unless otherwise specified. Possible scores range from 0-100 with higher scores indicating increased satisfaction. ‡ Adjusted for menopausal status (pre and peri/post) and prior UTI frequency (<4 and ≥4).

**Figure s4: Box plots of kidney and liver function blood tests over time, by randomised treatment group**

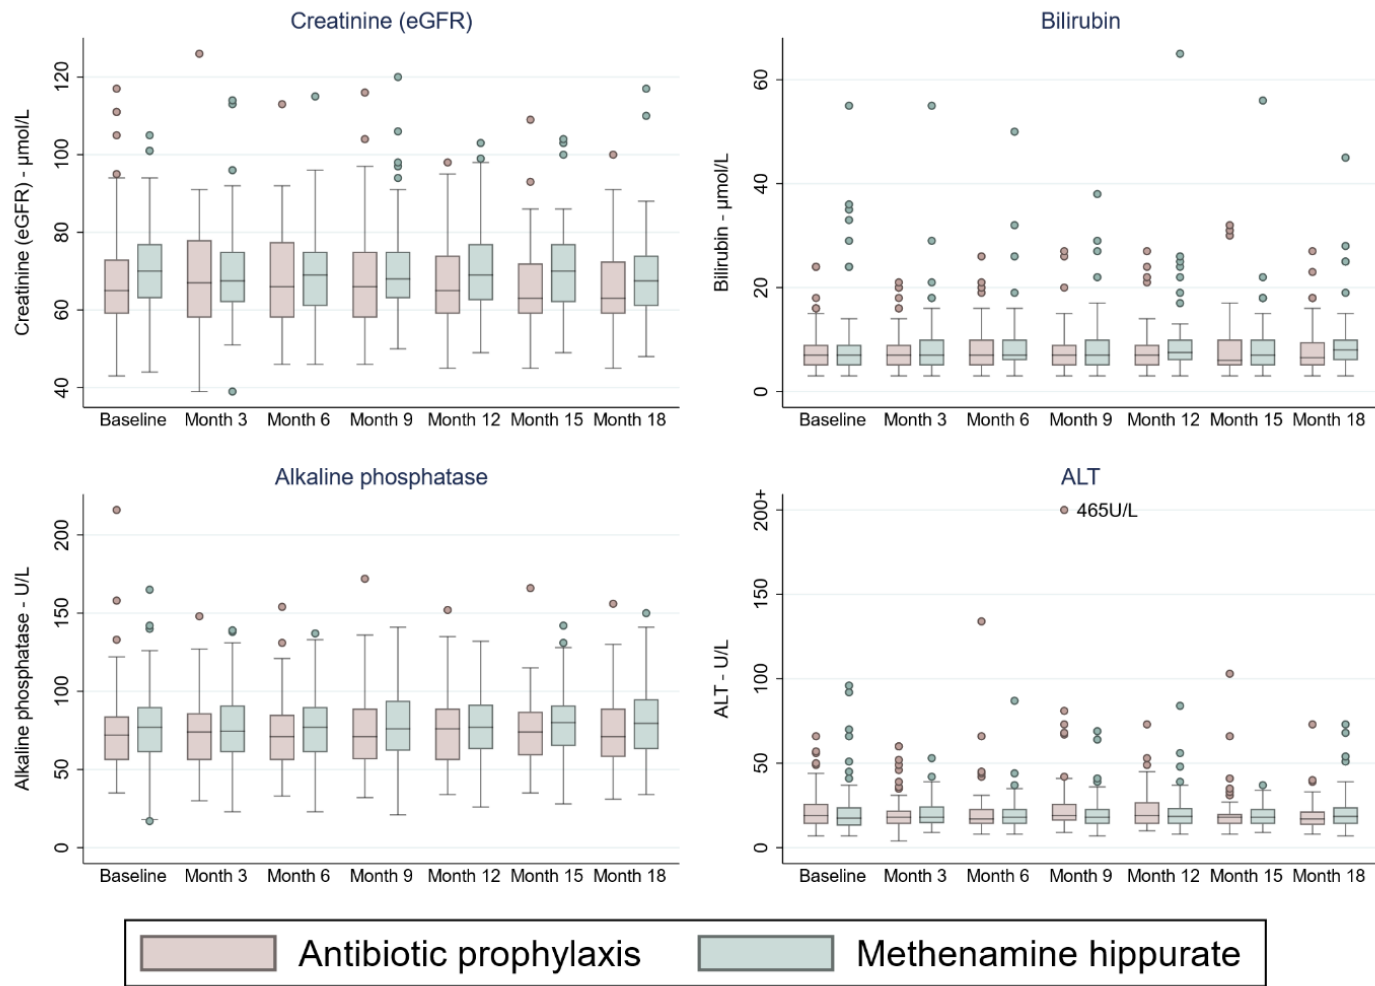

ALT: Alanine transaminase
